# Supplementary material for: SozRank: A new approach for localizing the epileptic seizure onset zone
Source: PLOS journal article supplement (doi:10.1371/journal.pcbi.1005953), 2018-01-30
Supplement: S2 (10.1371/journal.pcbi.1005953.s002) [file journal.pcbi.1005953.s002]

# S2 Text - Supporting Information for “SozRank: A new approach for localizing the epileptic seizure onset zone”

Yonathan Murin<sup>1</sup>, Jeremy Kim<sup>1</sup>, Josef Parvizi<sup>2</sup>, Andrea Goldsmith<sup>1</sup>

<sup>1</sup> Department of Electrical Engineering, Stanford University, Stanford, CA, USA

<sup>2</sup> Department of Neurology & Neurological Sciences, Stanford University, Stanford, CA, USA

This document details the full seizure-onset-zone (SOZ) inference results for the different inference approaches discussed in Tables 2–4 of the main manuscript. The numbers of the inferred electrodes together with the localization maps provided in Figures 2–4 of the main manuscript, facilitate calculating any statistics for comparing the different localization approaches.

## 1 Detailed Results for Table 2 of the Main Manuscript

Table 1 below details the inferred electrodes for the *GC only* and the *DI only* approaches (see Table 2 of the main manuscript). These results were obtained using PageRank for estimating the SOZ from the graph and using  $p_0 = 10$  and  $p_1 = 5$  in the post-processing phase.

Table 1: **Inferred electrodes for the *GC only* and the *DI only* approaches.**  $\phi$  denote the empty set, namely, no electrodes were estimated.

| Patient       | GC only                        | DI only                        |
|---------------|--------------------------------|--------------------------------|
| I001_P034_D01 | 23, 27, 29                     | 23,29                          |
| Study_004-2   | 17                             | 8,13,19                        |
| Study_006     | 7, 10, 15, 16, 23, 25          | $\phi$                         |
| Study_010     | 11, 20, 28, 37, 44             | 12, 20, 28, 37, 44             |
| Study_016     | $\phi$                         | 22                             |
| Study_017     | $\phi$                         | 5                              |
| Study_020     | 6, 9, 22                       | 14, 16, 17                     |
| Study_021     | 23, 47, 48                     | $\phi$                         |
| Study_022     | $\phi$                         | 4, 9, 15, 16                   |
| Study_023     | 2, 9, 10, 11, 17, 18, 26       | 2, 9, 10, 11, 17, 18, 19, 26   |
| Study_027     | 3,5                            | 2, 9                           |
| Study_033     | 29, 37, 38, 44, 45, 46, 53, 61 | $\phi$                         |
| Study_037     | 51, 55, 56, 60, 64             | 9, 28, 55, 56, 59, 64          |
| HUP64_phaseII | 15, 16, 23, 24, 31, 32         | 20, 23, 24, 31, 32, 34, 46, 59 |
| HUP65_phaseII | 11, 12, 19, 20, 27             | 12, 19, 20, 27                 |
| HUP68_phaseII | 4, 10, 11, 12, 19, 48          | 4, 5, 10, 11, 12, 14, 15, 20   |
| HUP70_phaseII | 3, 13, 20, 23, 29, 33          | 13,20,22,23,29                 |
| HUP78_phaseII | 55, 57                         | 33, 34, 41, 42, 49, 54, 57     |
| HUP87_phaseII | 20, 22, 28, 29, 35, 36, 37     | 28, 29, 31, 36, 37, 63         |

## 2 Detailed Results for Table 3 of the Main Manuscript

Table 2 below details the inferred electrodes for the *Net-flow* and *Top 5%* estimation methods (see Table 3 of the main manuscript). The Net-flow results were obtained using  $p_0 = 10$  and  $p_1 = 5$  in the post-processing phase.

Table 2: **Inferred electrodes for the *Net-flow* and *Top 5%* estimation methods.**  $\phi$  denote the empty set, namely, no electrodes were estimated.

| Patient       | Net-flow                      | Top 5%             |
|---------------|-------------------------------|--------------------|
| I001_P034_D01 | 23,29                         | 23, 27, 29         |
| Study_004-2   | 7, 8,13, 19, 20               | 13, 19, 20         |
| Study_006     | 1, 9, 20, 25, 48              | 1, 8, 9, 25        |
| Study_010     | 12, 19, 20, 28, 37, 44        | 12, 20, 37, 44     |
| Study_016     | 22                            | 3, 22, 23          |
| Study_017     | 3                             | 4                  |
| Study_020     | 6,14,16,17                    | 6, 14, 17          |
| Study_021     | 23,30, 47, 48                 | 23, 24, 32, 38     |
| Study_022     | 4, 9, 15, 16                  | 9, 15, 16          |
| Study_023     | 2, 9, 10, 11, 17, 18, 19, 26  | 2, 10, 11, 17, 18  |
| Study_027     | 2, 5, 9                       | 2, 9, 24           |
| Study_033     | 12, 30                        | 12, 20, 23, 30, 31 |
| Study_037     | 9, 28, 55, 56, 59, 64         | 9, 28, 55, 56, 64  |
| HUP64_phaseII | 31, 34                        | 23, 24, 31, 34, 59 |
| HUP65_phaseII | 12, 20, 21, 27, 28, 29, 37    | 12, 20, 28, 29, 37 |
| HUP68_phaseII | 4, 10, 11, 12, 14, 15, 19, 20 | 4, 11, 12, 14, 15  |
| HUP70_phaseII | 13, 14, 20, 22, 23, 29, 55    | 13, 20, 22, 23, 29 |
| HUP78_phaseII | 33, 34, 57                    | 33, 34, 41, 49, 57 |
| HUP87_phaseII | 24, 28, 29, 31, 36, 37, 63    | 28, 29, 36, 37, 63 |

### 3 Detailed Results for Table 4 of the Main Manuscript

Table 3 below details the inferred electrodes for the *5 seconds* and *20 seconds* windows (see Table 4 of the main manuscript). These results were obtained using PageRank for estimating the SOZ from the graph and using  $p_0 = 10$  and  $p_1 = 5$  in the post-processing phase.

Table 3: **Inferred electrodes for the 5 seconds and 20 seconds windows.**  $\phi$  denote the empty set, namely, no electrodes were estimated.

| Patient       | 5 seconds                  | 20 seconds                     |
|---------------|----------------------------|--------------------------------|
| I001_P034_D01 | 23, 29, 33                 | 21, 23, 27, 29, 33             |
| Study_004-2   | 13, 19, 26, 27             | 1, 2, 17, 19, 20               |
| Study_006     | 32                         | 7, 10, 15, 16, 17, 23, 25      |
| Study_010     | 20, 28, 29, 30             | 9, 12, 19, 20, 28, 37          |
| Study_016     | 22                         | 13, 22                         |
| Study_017     | $\phi$                     | 5                              |
| Study_020     | 14, 22                     | 9, 14                          |
| Study_021     | 36, 37, 38                 | 9                              |
| Study_022     | 3, 9, 16, 24               | 1, 9, 16                       |
| Study_023     | 10, 11, 17, 18, 19, 61     | 2, 9, 10, 11, 17, 18, 19       |
| Study_027     | 9                          | 2, 3, 9, 11                    |
| Study_033     | 18, 64                     | 36, 37, 61                     |
| Study_037     | 9, 51, 55, 56, 64          | 28, 35, 51, 55, 56, 64         |
| HUP64_phaseII | 22, 23, 30, 31, 32, 46, 60 | 23, 46, 54                     |
| HUP65_phaseII | 28, 35                     | 12, 18, 19, 20, 27, 37         |
| HUP68_phaseII | 11, 15, 16, 25             | 15, 25                         |
| HUP70_phaseII | 22, 23, 52, 53, 63, 64     | 21, 22, 23, 29, 43, 48, 63, 64 |
| HUP78_phaseII | 61                         | 49, 50, 57, 58, 59, 60         |
| HUP87_phaseII | 29, 31, 36                 | 29, 31                         |
